# Supplementary material
Source: publisher figshare collection journal article supplement (https://asha.figshare.com/articles/dataset/_/20669094)
Supplement: Supplementary file 1 [file 1]

**Supplemental Material S2.****Observed Print References and Total Time Coded, by Dyad**

| <b>Dyad</b> | <b>Child Print References</b> |                  |               |               | <b>Parent Print References</b> |                  |               |               |                     | <b>Total Time Coded (mm:ss:ms)</b> |
|-------------|-------------------------------|------------------|---------------|---------------|--------------------------------|------------------|---------------|---------------|---------------------|------------------------------------|
|             | <b>Total</b>                  | <b>Nonverbal</b> | <b>Verbal</b> | <b>Paired</b> | <b>Total</b>                   | <b>Nonverbal</b> | <b>Verbal</b> | <b>Paired</b> | <b>Oral Reading</b> |                                    |
| 1           | 4                             | 3                | 0             | 1             | 2                              | 0                | 0             | 0             | 2                   | 4:01:11                            |
| 2           | 10                            | 4                | 0             | 6             | 3                              | 0                | 2             | 0             | 1                   | 3:59:51                            |
| 3           | 3                             | 3                | 0             | 0             | 16                             | 0                | 2             | 2             | 12                  | 3:59:43                            |
| 4           | 17                            | 17               | 0             | 0             | 4                              | 0                | 2             | 1             | 1                   | 4:00:23                            |
| 5           | 4                             | 4                | 0             | 0             | 2                              | 0                | 2             | 0             | 0                   | 4:00:00                            |
| 6           | 6                             | 6                | 0             | 0             | 3                              | 0                | 1             | 0             | 2                   | 3:59:55                            |
| 7           | 16                            | 14               | 0             | 2             | 5                              | 0                | 0             | 4             | 1                   | 4:00:43                            |
| 8           | 34                            | 13               | 0             | 21            | 3                              | 0                | 0             | 0             | 3                   | 4:00:23                            |
| 9           | 2                             | 2                | 0             | 0             | 4                              | 0                | 0             | 0             | 4                   | 4:01:04                            |
| 10          | 28                            | 20               | 0             | 8             | 10                             | 0                | 0             | 0             | 10                  | 4:02:50                            |
| 11          | 24                            | 22               | 0             | 2             | 10                             | 1                | 0             | 2             | 7                   | 4:00:02                            |
| 12          | 17                            | 11               | 0             | 6             | 6                              | 0                | 2             | 0             | 4                   | 4:01:01                            |
| 13          | 16                            | 14               | 0             | 2             | 3                              | 0                | 0             | 0             | 3                   | 3:57:47                            |
| 14          | 0                             | 0                | 0             | 0             | 0                              | 0                | 0             | 0             | 0                   | 4:00:43                            |
| 15          | 5                             | 5                | 0             | 0             | 3                              | 0                | 0             | 0             | 3                   | 3:58:17                            |
| 16          | 14                            | 11               | 0             | 3             | 20                             | 0                | 7             | 7             | 6                   | 4:01:04                            |
| 17          | 9                             | 9                | 0             | 0             | 4                              | 0                | 0             | 4             | 0                   | 4:00:00                            |
| 18          | 1                             | 1                | 0             | 0             | 3                              | 0                | 1             | 1             | 1                   | 3:59:40                            |
| 19          | 10                            | 10               | 0             | 0             | 23                             | 0                | 12            | 8             | 3                   | 3:59:49                            |
| 20          | 8                             | 8                | 0             | 0             | 8                              | 1                | 2             | 0             | 5                   | 3:59:15                            |
| 21          | 2                             | 2                | 0             | 0             | 2                              | 0                | 1             | 1             | 0                   | 3:59:23                            |
| 22          | 3                             | 3                | 0             | 0             | 0                              | 0                | 0             | 0             | 0                   | 4:01:09                            |
| 23          | 51                            | 51               | 0             | 0             | 0                              | 0                | 0             | 0             | 0                   | 4:00:16                            |
| 24          | 0                             | 0                | 0             | 0             | 3                              | 0                | 0             | 0             | 3                   | 3:51:17                            |
| 25          | 30                            | 30               | 0             | 0             | 0                              | 0                | 0             | 0             | 0                   | 4:00:00                            |
| 26          | 3                             | 3                | 0             | 0             | 9                              | 0                | 3             | 6             | 0                   | 4:00:00                            |

|    |    |    |   |   |    |   |   |   |   |         |
|----|----|----|---|---|----|---|---|---|---|---------|
| 27 | 30 | 30 | 0 | 0 | 11 | 0 | 4 | 6 | 1 | 4:00:53 |
| 28 | 2  | 2  | 0 | 0 | 5  | 0 | 2 | 0 | 3 | 4:00:17 |
| 29 | 6  | 6  | 0 | 0 | 1  | 0 | 0 | 1 | 0 | 3:59:51 |
| 30 | 4  | 4  | 0 | 0 | 5  | 0 | 1 | 1 | 3 | 4:00:40 |

*Note.* Paired print references included any combination of verbal and nonverbal behavior (e.g., pointing while labeling, tracking while sounding out letters in a word). Print references during oral reading included any nonverbal print reference that occurred while parent read text verbatim from book.
