# Supplementary material
Source: publisher figshare collection journal article supplement (https://asha.figshare.com/articles/dataset/_/20669094)
Supplement: Supplementary file 2 [file 1]

## Supplemental Material S1.

### Correlation Tables for all Independent, Dependent, and Demographic Variables

| Variable                   | 1. Child Age   |          | 2. Perceived Self-Efficacy |          | 3. Parent Developmental Knowledge |          | 4. Child Print References |          | 5. Parent Print References |          | 6. Reading Frequency |          |
|----------------------------|----------------|----------|----------------------------|----------|-----------------------------------|----------|---------------------------|----------|----------------------------|----------|----------------------|----------|
|                            | Spearman's Rho | <i>p</i> | Spearman's Rho             | <i>p</i> | Spearman's Rho                    | <i>p</i> | Spearman's Rho            | <i>p</i> | Spearman's Rho             | <i>p</i> | Spearman's Rho       | <i>p</i> |
| 2. Perceived Self-Efficacy | -0.298         | 0.183    |                            |          |                                   |          |                           |          |                            |          |                      |          |
| 3. Developmental Knowledge | -0.243         | 0.628    | 0.229                      | 0.356    |                                   |          |                           |          |                            |          |                      |          |
| 4. Child Print References  | 0.175          | 0.233    | -0.146                     | 0.251    | 0.033                             | 0.433    |                           |          |                            |          |                      |          |
| 5. Parent Print References | 0.11           | 0.832    | 0.429*                     | 0.018    | 0.294*                            | 0.070    | 0.367                     | 0.889    |                            |          |                      |          |
| 6. Reading Frequency       | -0.201         | 0.608    | 0.437*                     | 0.042    | 0.35                              | 0.123    | 0.095                     | 0.991    | 0.437*                     | 0.033    |                      |          |
| 7. Reading Time            | -0.013         | 0.399    | 0.305                      | 0.256    | 0.167                             | 0.351    | -0.05                     | 0.750    | 0.136                      | 0.732    | 0.823**              | 0.0003   |

*Note* . Above table includes all continuous variables. Spearman rank-order correlation coefficients and *p* values displayed in table.

\**p* < .05

\*\**p* < .001

|                       | Dependent Variables    |    |          |                         |    |          | Independent Variables |    |          |              |    |          |
|-----------------------|------------------------|----|----------|-------------------------|----|----------|-----------------------|----|----------|--------------|----|----------|
|                       | Child Print References |    |          | Parent Print References |    |          | Reading Frequency     |    |          | Reading Time |    |          |
|                       | Chi                    |    |          | Chi                     |    |          | Chi                   |    |          | Chi          |    |          |
|                       | Squared                | df | <i>p</i> | Squared                 | df | <i>p</i> | Squared               | df | <i>p</i> | Squared      | df | <i>p</i> |
| Demographic Variables |                        |    |          |                         |    |          |                       |    |          |              |    |          |
| Child Sex             | 6.04*                  | 1  | 0.014    | 3.103                   | 1  | 0.078    | 0.013                 | 1  | 0.907    | 0.193        | 1  | 0.661    |
| Child Ethnicity       | 0.339                  | 4  | 0.987    | 3.029                   | 4  | 0.553    | 5.472                 | 4  | 0.242    | 4.107        | 4  | 0.392    |
| Parent Ethnicity      | 0.339                  | 4  | 0.987    | 3.029                   | 4  | 0.553    | 5.472                 | 4  | 0.242    | 4.107        | 4  | 0.392    |
| Maternal education    | 1.08                   | 1  | 0.299    | 0.016                   | 1  | 0.9      | 0.338                 | 1  | 0.561    | 0.087        | 1  | 0.769    |
| Household Income      | 8.372*                 | 2  | 0.015    | 1.185                   | 2  | 0.553    | 4.112                 | 2  | 0.128    | 5.356        | 2  | 0.069    |
| Employment Status     | 0.681                  | 1  | 0.681    | 0.095                   | 1  | 0.758    | 0.318                 | 1  | 0.573    | 0.34         | 1  | 0.56     |
| Marital Status        | 0.358                  | 1  | 0.556    | 5.006*                  | 1  | 0.025    | 0.45                  | 1  | 0.502    | 1.476        | 1  | 0.224    |
| Language              | 0.141                  | 1  | 0.7077   | 2.676                   | 1  | 0.102    | 0.156                 | 1  | 0.692    | 1.800        | 1  | 0.180    |

*Note* . Above table includes all categorical variables. Kruskal-Wallis statistic (Chi Squared), degrees of freedom, and *p* values displayed in table.

\**p* < .05
